# Supplementary material for: Novel Role for Matrix Metalloproteinase 9 in Modulation of Cholesterol Metabolism
Source: PubMed Central journal article supplement — J Am Heart Assoc. 2016 Sep 30;5(10):e004228. doi: 10.1161/JAHA.116.004228 (PMC5121519; doi:10.1161/jaha.116.004228), 2016-09-30
Supplement: JAH3-5-e004228-s001.pdf [file JAH3-5-e004228-s001.pdf]

## **SUPPLEMENTAL MATERIAL**

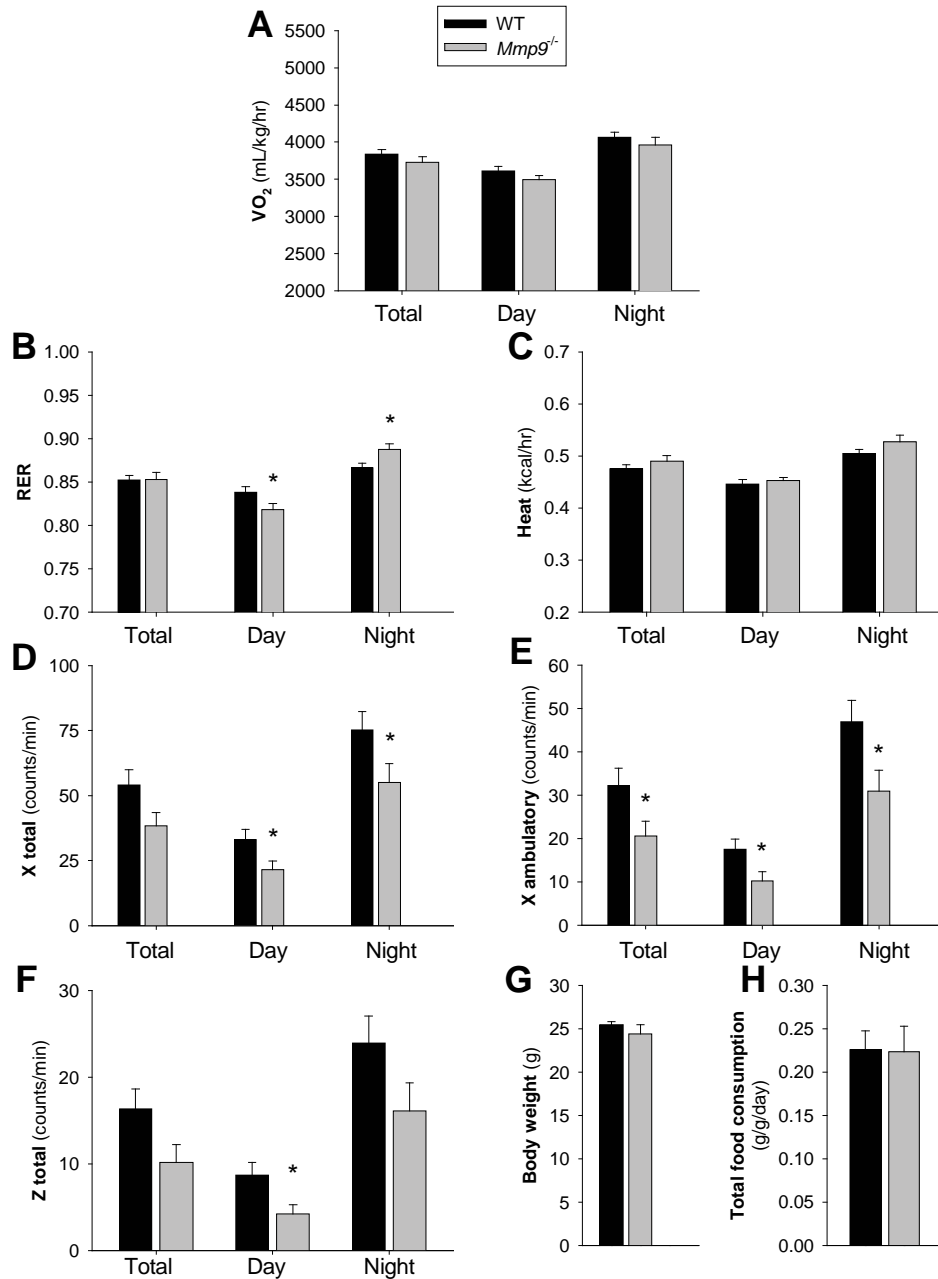

**Figure S1. Systemic metabolic profile of MMP-9 deficient mice.**

(A) Oxygen consumption. (B) Carbon dioxide production. (C) Heat / Energy expenditure (normalized to body weight). (D-F) Locomotor activity. (G) Body weight. (H) Total food consumption. The studies were conducted in metabolic cages.  $n=7$  WT mice,  $n=5$  *Mmp9*<sup>-/-</sup> mice. \*:  $P \leq 0.05$  vs. WT.

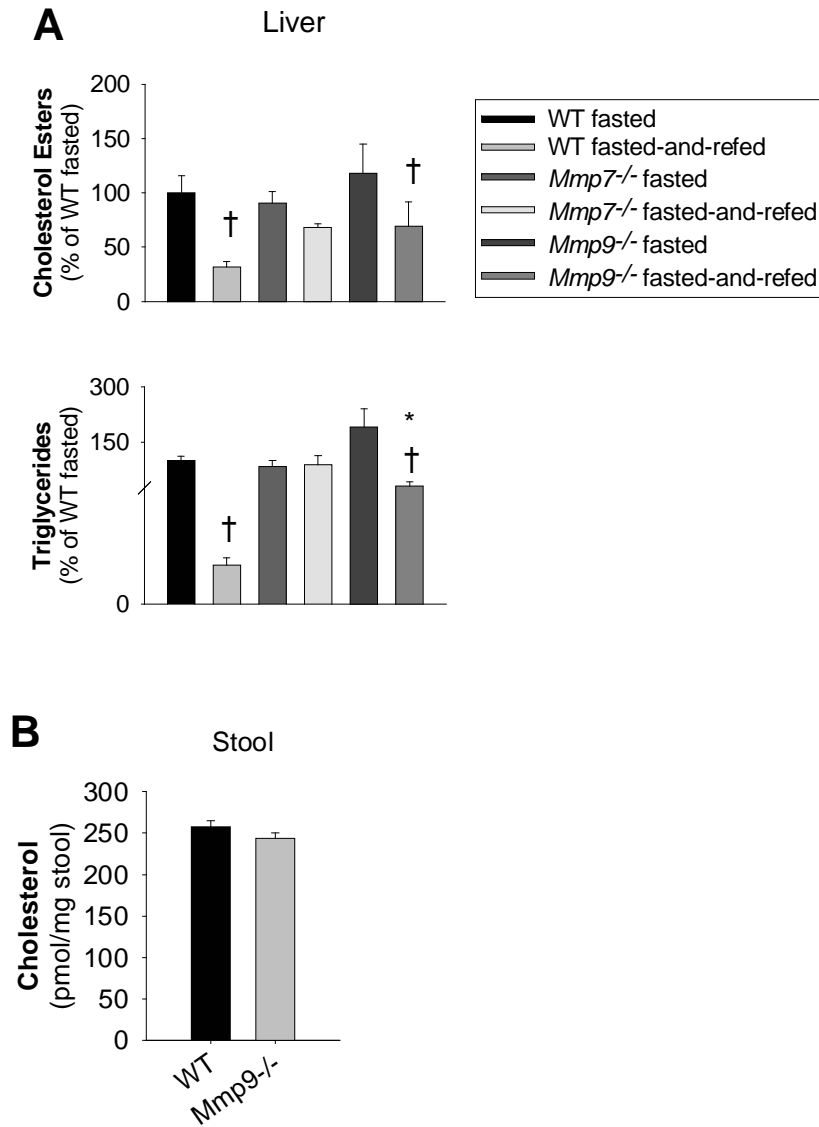

**Figure S2. Supplemental quantitative analysis of lipids.**

(A) Esterified lipids were elevated in livers from *Mmp9*<sup>-/-</sup> mice compared to livers from WT mice, particularly when the mice were fasted-and-refed a high carbohydrate diet. In contrast to *Mmp9*<sup>-/-</sup> mice, mice lacking MMP-7 (*Mmp7*<sup>-/-</sup>) had a different hepatic lipid profile. *n*=4 mice per group, except *n*=3 for *Mmp7*<sup>-/-</sup> fasted-and-refed. †*P*≤0.05 vs. fasted for each genotype. \*:*P*≤0.05 vs. WT fasted-and-refed.

(B) Cholesterol excretion was unchanged in *Mmp9*<sup>-/-</sup> mice. *n*=4 mice per genotype.

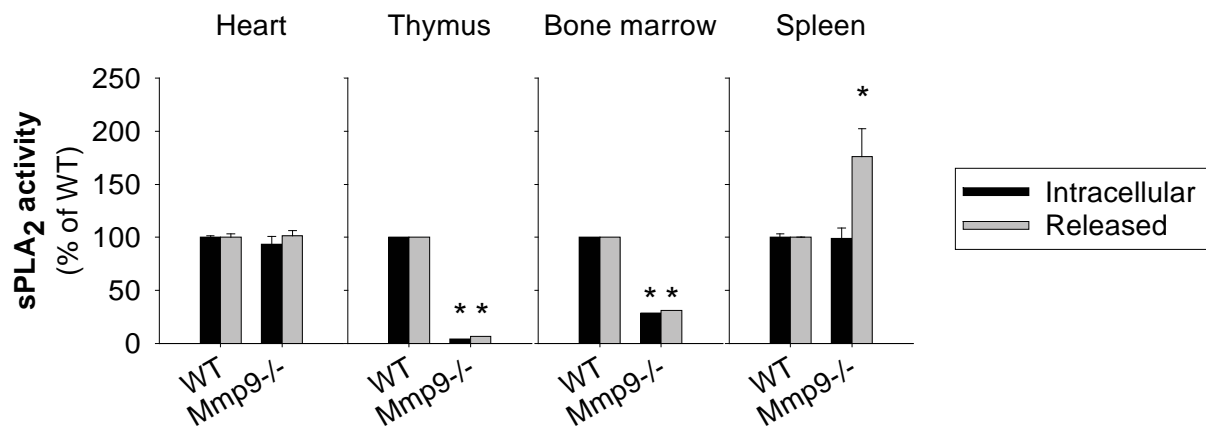

**Figure S3. Spleen is a likely source of plasma sPLA<sub>2</sub> in MMP-9-deficient mice.** sPLA<sub>2</sub> activity was analyzed in duplicate using pools of the indicated tissues.  $n=3$  WT and  $n=4$  *Mmp9*<sup>-/-</sup> mice. \*:  $P<0.05$  vs. WT.

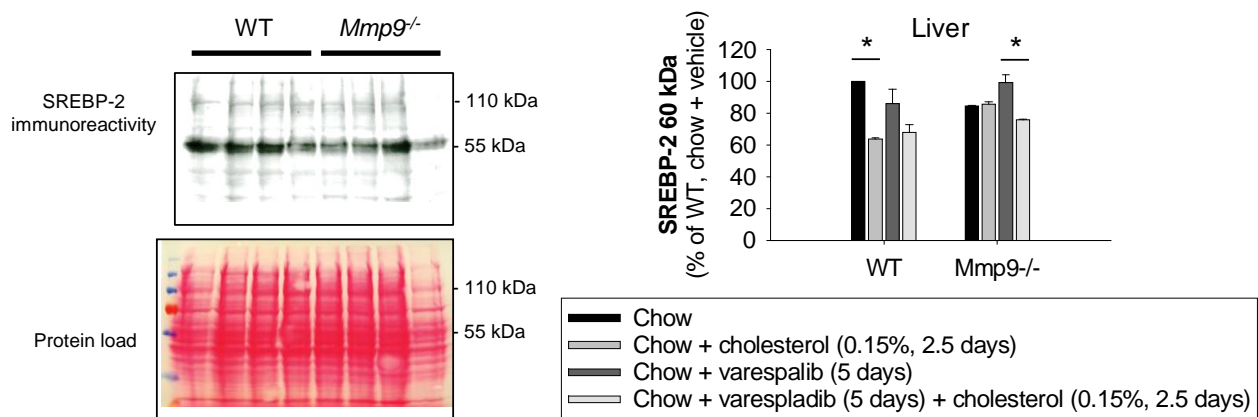

**Figure S4. SREBP-2 expression in response to dietary cholesterol and varespladib.** *Left:* Western blot showing amount of hepatic SREBP-2 protein in *Mmp9* mice in response to varespladib and dietary cholesterol supplementation. The experiment involved  $n=4$  to 5 mice *per* group (or treatment). For analysis, livers were pooled, homogenized and the fraction containing nuclei was subjected to western blot analysis with SREBP-2 antibodies. *Right:* Quantitative analysis for two independent preparations and western blots. \*:  $P \leq 0.05$  vs. untreated.

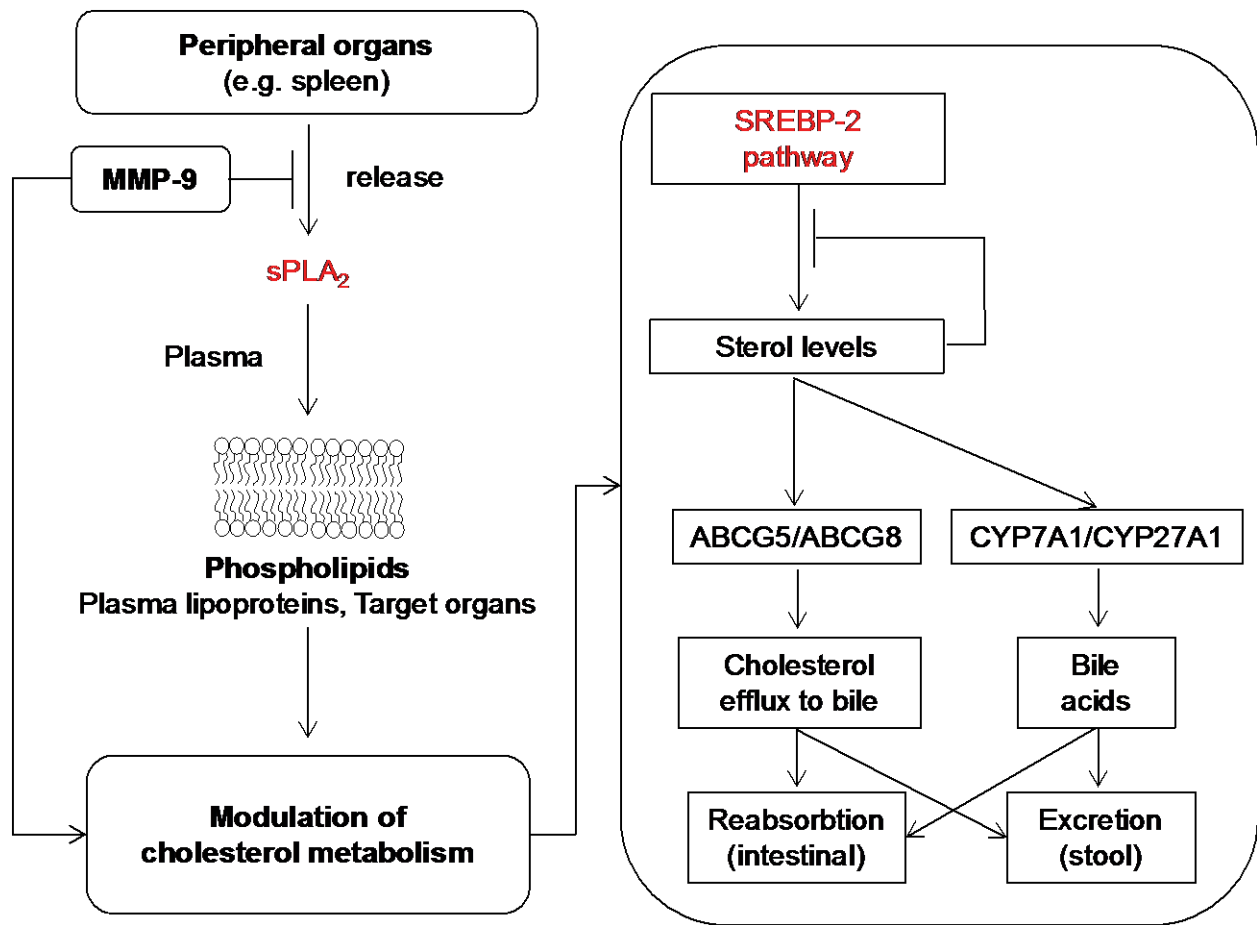

**Figure S5. Proposed model.** MMP-9 regulates cholesterol metabolism through PLA<sub>2</sub>-dependent and PLA<sub>2</sub>-independent mechanisms. Important elements are: peripheral organs (e.g., the spleen) acting as source of plasma sPLA<sub>2</sub> activity and MMP-9 (inhibitor of sPLA<sub>2</sub> release from peripheral organs). Once in the circulation, sPLA<sub>2</sub> acts on plasma lipoproteins or target organs (e.g., the liver) to release lipid mediators from phospholipids that ultimately influence cholesterol metabolism. Furthermore, the direct action of MMP-9 in the liver may influence hepatic cholesterol through as yet unclear PLA<sub>2</sub>-independent pathways.

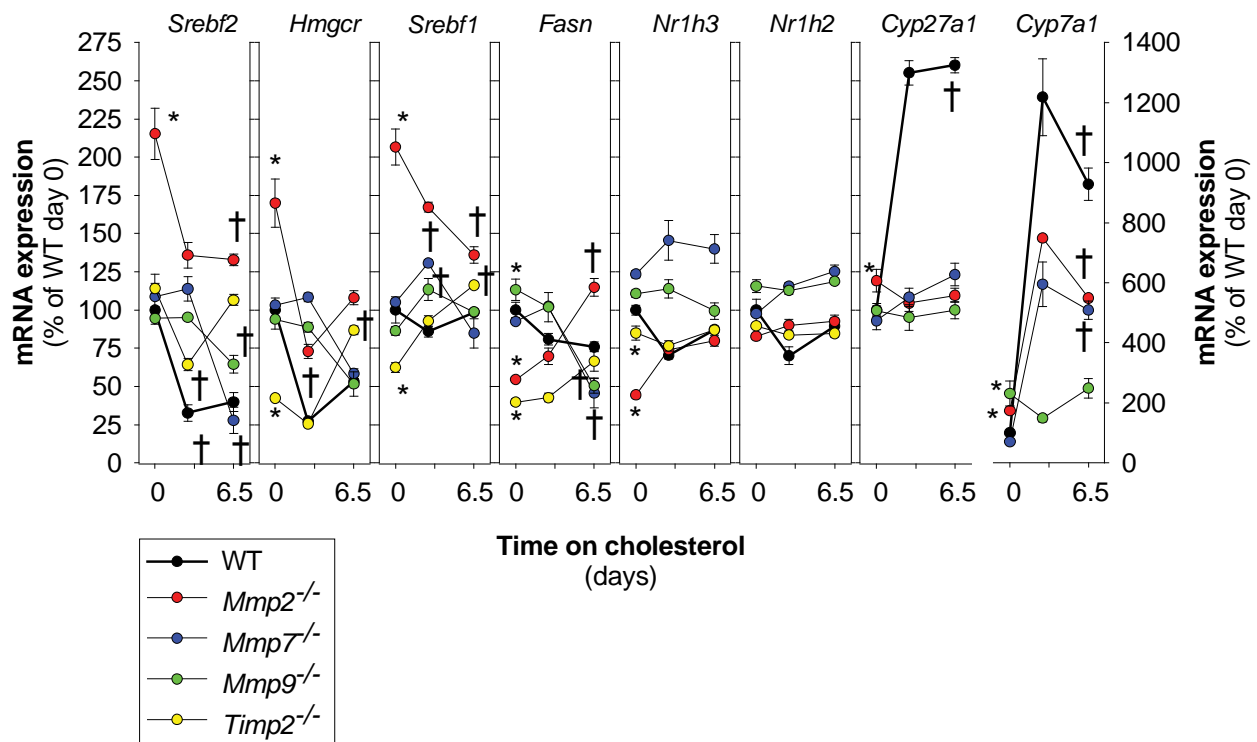

**Figure S6.** Supplement to Figure 7A containing the quantitative analysis of hepatic transcriptional responses to dietary cholesterol for the indicated genes and genotypes.  $n=6$  WT mice,  $n=8$  *Mmp2*<sup>-/-</sup> mice,  $n=5$  *Mmp7*<sup>-/-</sup> mice,  $n=5$  *Mmp9*<sup>-/-</sup> mice and  $n=5$  *Timp2*<sup>-/-</sup> mice. \*:  $P < 0.05$  vs. WT. †:  $P < 0.05$  vs. 0 days on cholesterol.

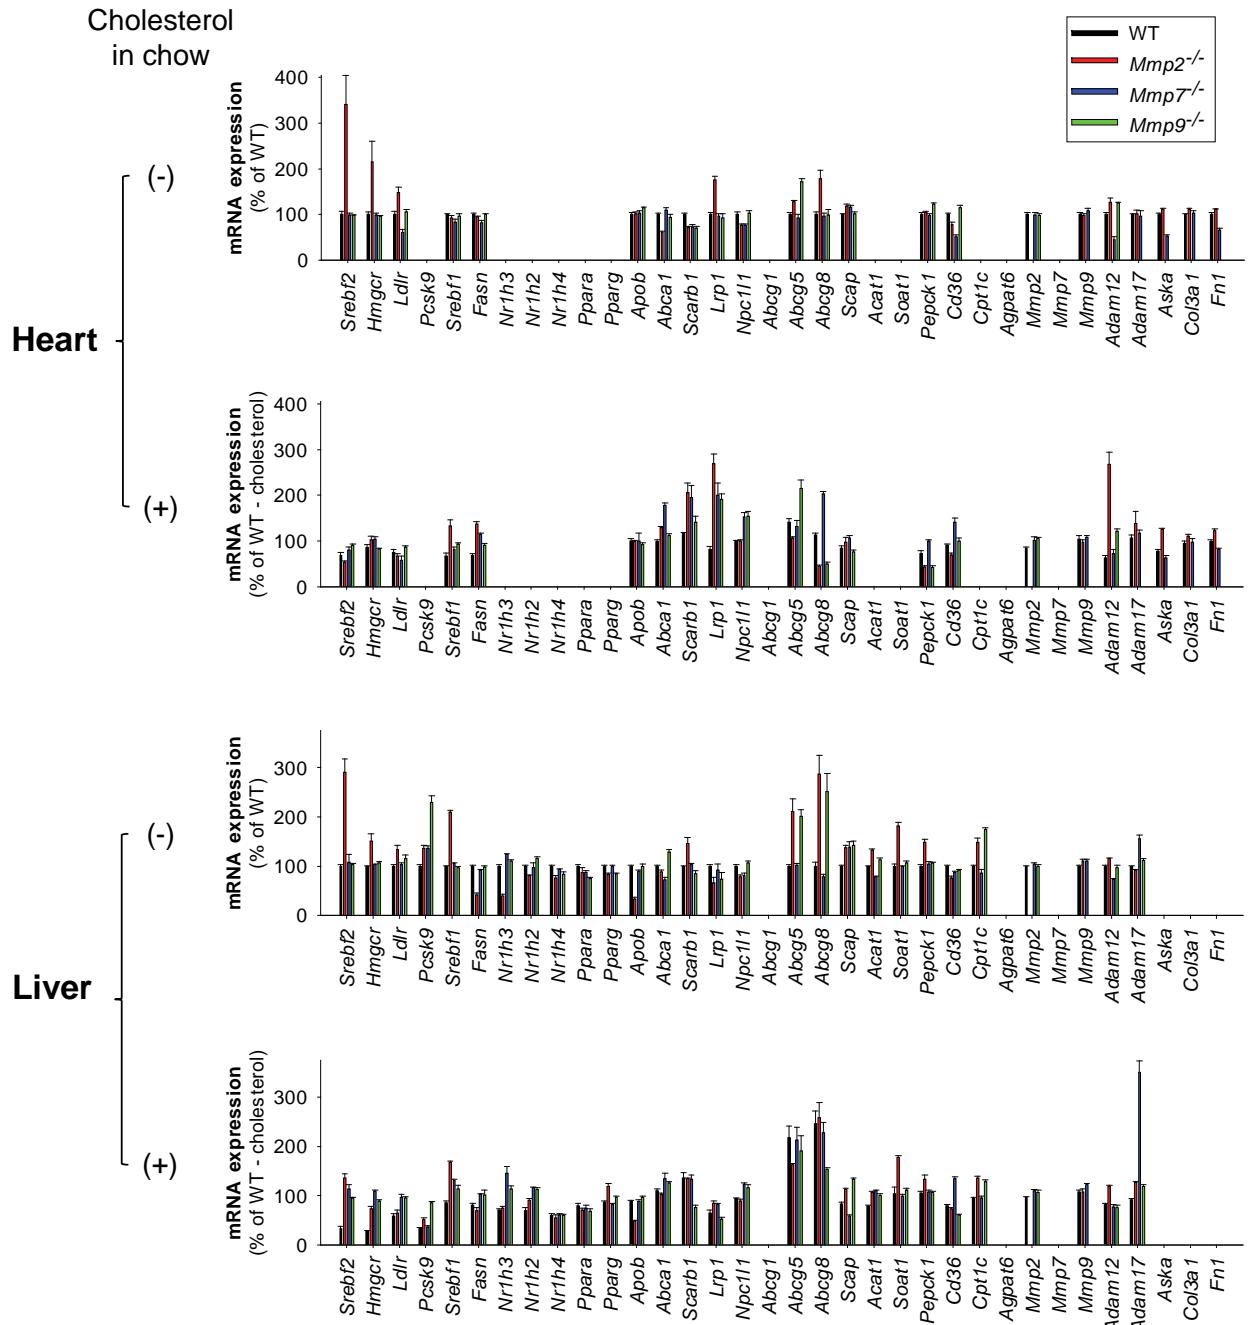

**Figure S7.** Extended quantitative analysis of the relative mRNA expression of cardiac and hepatic lipid metabolic and metalloproteinase genes and their response to dietary supplementation with 0.15% cholesterol for 2.5 days in mice deficient in one of several MMPs.  $n=6$  WT mice,  $n=8$   $Mmp2^{-/-}$  mice,  $n=5$   $Mmp7^{-/-}$  mice,  $n=5$   $Mmp9^{-/-}$  mice. Slots without bars: Gene expression was not determined.
